# Supplementary material for: Discovery of G-quadruplex stabilizing ligands through direct ELISA of a one-bead-one-compound library
Source: Royal Society of Chemistry journal article supplement (doi:10.1039/b611716c), 2006-01-01
Supplement: b611716c.pdf [file b611716c.pdf]

**Discovery of G-quadruplex stabilizing ligands through direct ELISA of a one-bead-one-compound library**

**James E. Redman, Sylvain Ladame, Anthony P. Reszka, Stephen Neidle, Shankar Balasubramanian**

**Supporting Information**

**Oligonucleotide sequences**

Htelo            5' Biotin-GTT AGG GTT AGG GTT AGG GTT AGG GTT AGG 3'

Bck             5' Biotin-AGT TAG AGT TAG AGT TAG AGT TAG AGT TAG 3'

Dup             5' Biotin-GGC ATA GTG CGT GGG CGT TAG C 3'

                  5' GCT AAC GCC CAC GCA CTA TGC C 3'

F21T            5' FAM-GGG TTA GGG TTA GGG TTA GGG-TAMRA 3'

## Polyamide structures and sequences, structures of amino acids

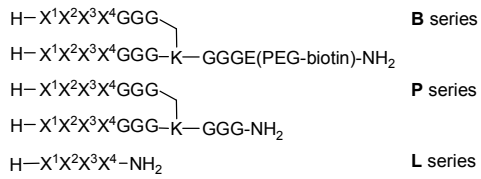

| Number | Tetrapeptide sequence XXXX |
|--------|----------------------------|
| 1      | YRHY                       |
| 2      | WR-Py-Y                    |
| 3      | FRKV                       |
| 4      | Y-Im-Py-R                  |
| 5      | Y-Im-KV                    |
| 6      | Y-Im-HR                    |
| 7      | WK-Py-Y                    |
| 8      | WKKR                       |

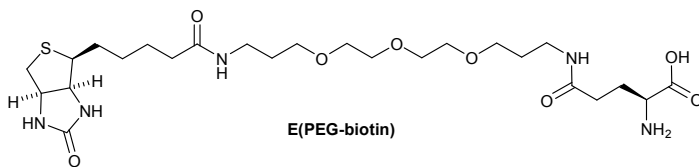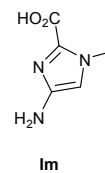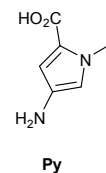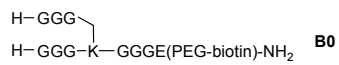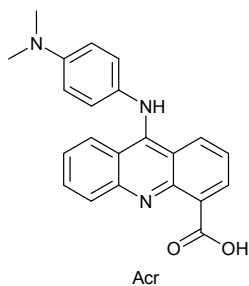

Amino acid analysis of peptides **B0 – B8**, **P1 – P8** and **L1 – L8**.

| Compound  | Observed $m/z$                 | r.t. (min) <sup>a</sup> | Amino acid analysis                                                                |
|-----------|--------------------------------|-------------------------|------------------------------------------------------------------------------------|
| <b>B0</b> | 1217 [M+H] <sup>+</sup>        | 12.8                    | E 1.03(0.03), G 8.97(0.02), K 1.00(0.01)                                           |
| <b>B1</b> | 2455 [M+H] <sup>+</sup>        | 13.1                    | E 1.09(0.01), G 9.56(0.01), Y 3.65(0.01), H 1.88(0.01), K 1.08(0.01), R 1.73(0.01) |
| <b>B2</b> | 2471 [M+H] <sup>+</sup>        | 14.9                    | E 1.14(0.04), G 9.39(0.01), Y 1.86(0.01), K 1.04(0.00), R 1.56(0.02)               |
| <b>B3</b> | 1139.7<br>[M+2H] <sup>2+</sup> | 13.4                    | E 1.13(0.01), G 8.85(0.00), V 1.98, F 1.98(0.01), K 3.07(0.01), R 1.99 (0.00)      |
| <b>B4</b> | 1173.6<br>[M+2H] <sup>2+</sup> | 14.0                    | E 1.06(0.02), G 9.21(0.04), Y 1.76 (0.00), K 1.03(0.00), R 1.94(0.02)              |
| <b>B5</b> | 1122.6<br>[M+2H] <sup>2+</sup> | 13.9                    | E 1.09(0.00), G 9.09(0.00), V 1.97, Y 1.84(0.01), K 3.01(0.00)                     |
| <b>B6</b> | 2375 [M+H] <sup>+</sup>        | 13.2                    | E 1.17(0.01), G 9.57(0.07), Y 1.55(0.03), H 1.85(0.01), K 1.05(0.01), R 1.80(0.01) |
| <b>B7</b> | 2415 [M+H] <sup>+</sup>        | 14.7                    | E 1.08(0.01), G 9.34(0.01), Y 1.97(0.00), K 2.61 (0.00)                            |
| <b>B8</b> | 2413 [M+H] <sup>+</sup>        | 13.1                    | E 1.10(0.01), G 9.14(0.01), K 4.89(0.00), R 1.88(0.00)                             |
| <b>P1</b> | 949.5 [M+2H] <sup>2+</sup>     | 12.4                    | G 9.03(0.00), Y 4.07 (0.00), H 1.99(0.00), K 0.94(0.00), R 1.96(0.00)              |
| <b>P2</b> | 958.0 [M+2H] <sup>2+</sup>     | 15.4                    | G 9.10(0.03), Y 1.98(0.02), K 0.95(0.00), R 1.96(0.01),                            |

|           |                            |      |                                                                      |
|-----------|----------------------------|------|----------------------------------------------------------------------|
| <b>P3</b> | 860.5 [M+2H] <sup>2+</sup> | 12.7 | G 8.81(0.01), V 2.02, F 2.01(0.00), K 3.10(0.01), R 2.05(0.00)       |
| <b>P4</b> | 894.4 [M+2H] <sup>2+</sup> | 14.1 | G 9.39(0.01), Y 1.77(0.01), K 0.95(0.01), R 1.88(0.01)               |
| <b>P5</b> | 843.5 [M+2H] <sup>2+</sup> | 14.0 | G 8.94(0.02), V 2.00, Y 1.97(0.00), K 3.08(0.00)                     |
| <b>P6</b> | 909.4 [M+2H] <sup>2+</sup> | 12.3 | G 9.26(0.03), Y 1.85(0.01), H 1.92(0.00), K 1.00(0.01), R 1.96(0.02) |
| <b>P7</b> | 929.5 [M+2H] <sup>2+</sup> | 15.4 | G 9.10(0.01), Y 1.93(0.01), K 2.97(0.00)                             |
| <b>P8</b> | 929.0 [M+2H] <sup>2+</sup> | 12.5 | G 8.98(0.00), K 5.05(0.00), R 1.97(0.00)                             |
| <b>L1</b> | 637.3 [M+H] <sup>+</sup>   | 12.6 | Y 2.02(0.00), H 0.99(0.00), R 0.99(0.00)                             |
| <b>L2</b> | 645.4 [M+H] <sup>+</sup>   | 17.0 | Y 0.99(0.01), R 1.01(0.01)                                           |
| <b>L3</b> | 548.4 [M+H] <sup>+</sup>   | 12.8 | V 1.00, K 1.00(0.00), R 1.01(0.00)                                   |
| <b>L4</b> | 582.3 [M+H] <sup>+</sup>   | 15.5 | Y 0.99(0.01), R 1.01(0.01)                                           |
| <b>L5</b> | 531.3 [M+H] <sup>+</sup>   | 15.2 | V 1.00(0.01), Y 0.99(0.00), K 1.01(0.00)                             |
| <b>L6</b> | 597.3 [M+H] <sup>+</sup>   | 12.3 | Y 0.97(0.00), H 1.01(0.00), R 1.02(0.00)                             |
| <b>L7</b> | 617.3 [M+H] <sup>+</sup>   | 16.7 | Y 0.98(0.00), K 1.02(0.00)                                           |
| <b>L8</b> | 616.4 [M+H] <sup>+</sup>   | 11.9 | K 2.04(0.00), R 0.96 (0.00)                                          |

<sup>a</sup>HPLC methods: **B** series, 0 – 2.5 min 5% B, 20.0 min 60% B; **P** series, 0 – 2.5 min 5% B, 20.0 min 50% B; **L** series, 0 – 2.5 min 5% B, 20 min 40% B. For all methods: Phenomenex C18 Luna 5  $\mu$ M, 250  $\times$  4.6 mm column, flow rate 1 cm<sup>3</sup> min<sup>-1</sup>, detection by absorbance at 220 nm. Solvent A = H<sub>2</sub>O, 0.1% TFA, solvent B = MeCN, 0.1% TFA.

## Surface plasmon resonance data and regression

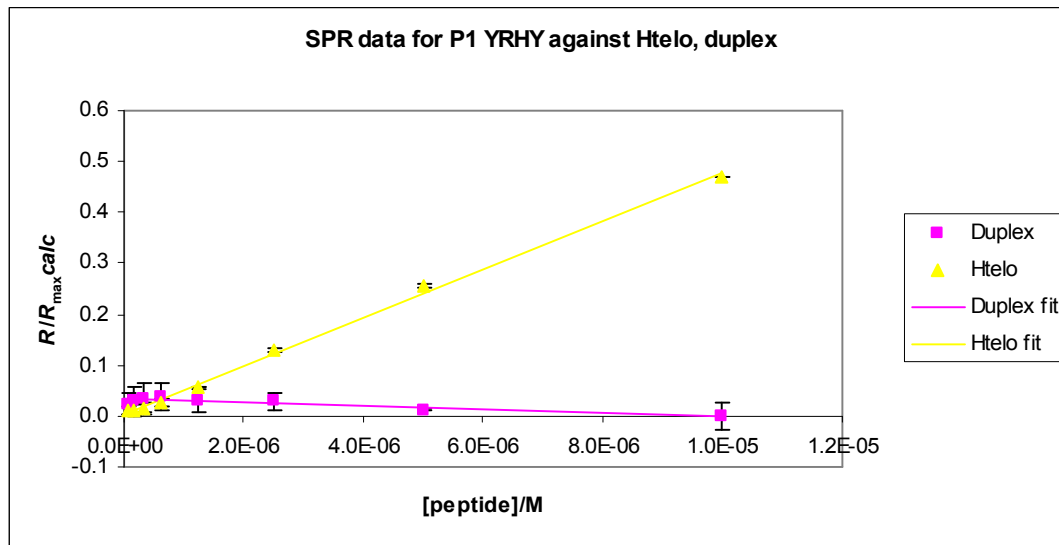

### Duplex

|                 |                    |             |                      |
|-----------------|--------------------|-------------|----------------------|
| Slope ( $K_a$ ) | $-3.3 \times 10^3$ | Intercept   | $3.3 \times 10^{-2}$ |
| Std error       | $2.3 \times 10^3$  | Std error   | $9.4 \times 10^{-3}$ |
| $R^2$           | 0.065              | F statistic | 2.1                  |
| DoF             | 30                 |             |                      |

### Htelo

|                 |                     |             |                      |
|-----------------|---------------------|-------------|----------------------|
| Slope ( $K_a$ ) | $4.742 \times 10^4$ | Intercept   | $3.9 \times 10^{-3}$ |
| Std error       | $8.3 \times 10^2$   | Std error   | $3.4 \times 10^{-3}$ |
| $R^2$           | 0.99                | F statistic | $3.2 \times 10^3$    |
| DoF             | 30                  |             |                      |

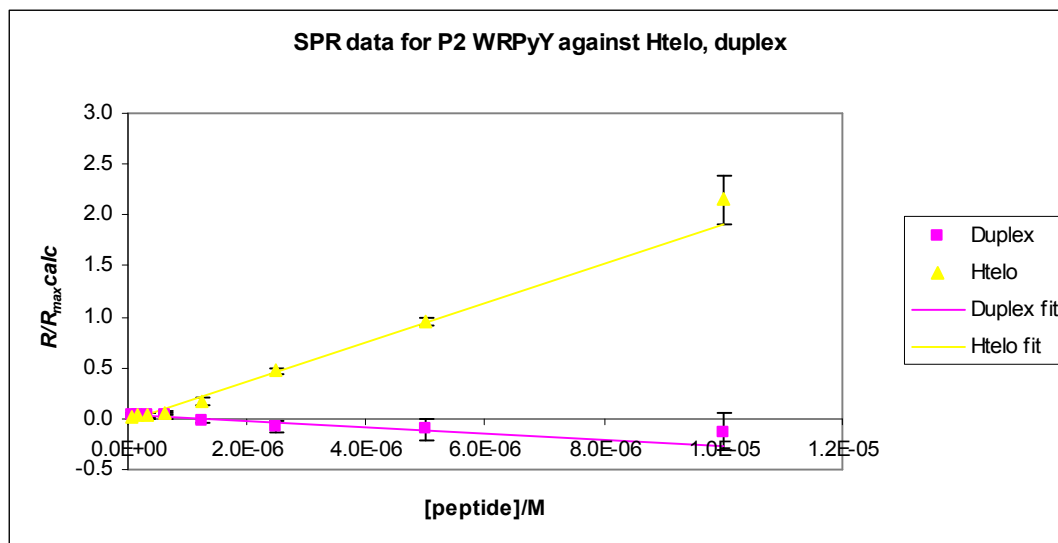

**Duplex**

|                |                    |             |                      |
|----------------|--------------------|-------------|----------------------|
| Slope (Ka)     | $-3.0 \times 10^4$ | Intercept   | $3.0 \times 10^{-2}$ |
| Std error      | $1.0 \times 10^4$  | Std error   | $2.3 \times 10^{-2}$ |
| R <sup>2</sup> | 0.24               | F statistic | 8.4                  |
| DoF            | 26                 |             |                      |

**Htelo**

|                |                     |             |                       |
|----------------|---------------------|-------------|-----------------------|
| Slope (Ka)     | $1.932 \times 10^5$ | Intercept   | $-2.6 \times 10^{-2}$ |
| Std error      | $5.8 \times 10^3$   | Std error   | $1.3 \times 10^{-2}$  |
| R <sup>2</sup> | 0.98                | F statistic | $1.1 \times 10^3$     |
| DoF            | 26                  |             |                       |

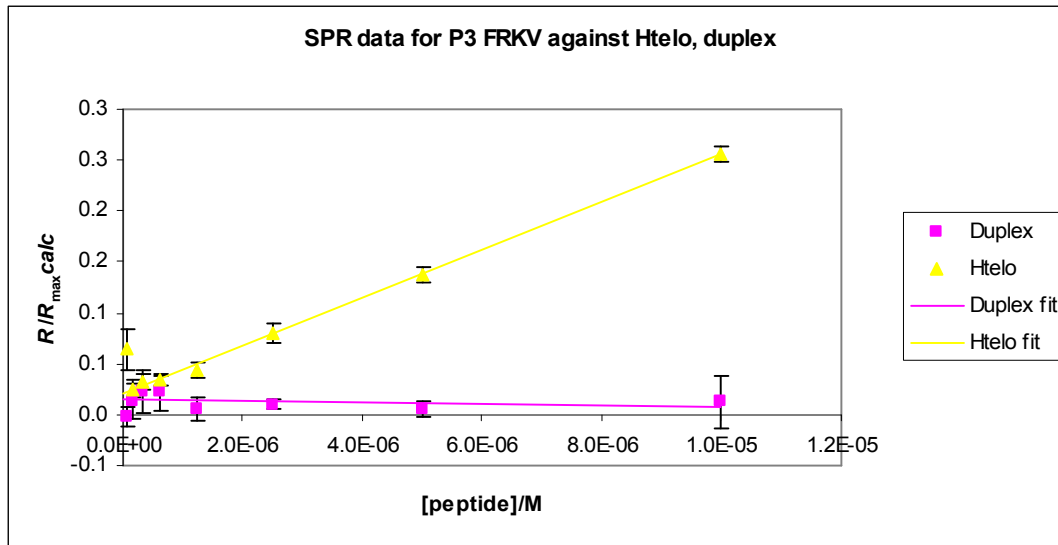

**Duplex**

|                |                      |             |                       |
|----------------|----------------------|-------------|-----------------------|
| Slope (Ka)     | $-7 \times 10^2$     | Intercept   | $1.51 \times 10^{-2}$ |
| Std error      | $1.7 \times 10^3$    | Std error   | $7.6 \times 10^{-3}$  |
| R <sup>2</sup> | $6.2 \times 10^{-3}$ | F statistic | $1.6 \times 10^{-1}$  |
| DoF            | 26                   |             |                       |

**Htelo**

|                |                     |             |                       |
|----------------|---------------------|-------------|-----------------------|
| Slope (Ka)     | $2.352 \times 10^4$ | Intercept   | $2.01 \times 10^{-2}$ |
| Std error      | $8.1 \times 10^2$   | Std error   | $3.5 \times 10^{-3}$  |
| R <sup>2</sup> | 0.97                | F statistic | $8.4 \times 10^2$     |
| DoF            | 26                  |             |                       |

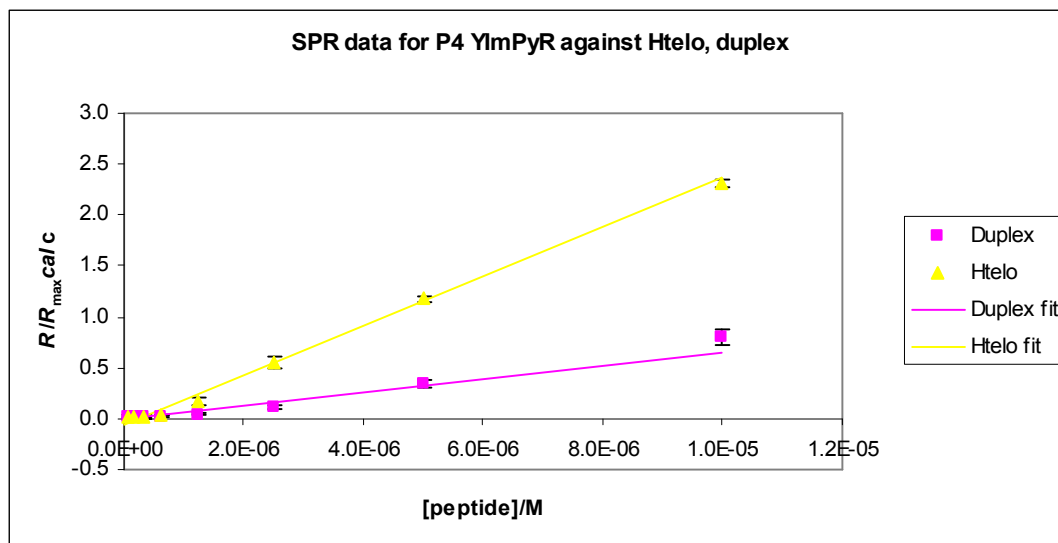

**Duplex**

|                |                    |             |                      |
|----------------|--------------------|-------------|----------------------|
| Slope (Ka)     | $6.53 \times 10^4$ | Intercept   | $-8 \times 10^{-3}$  |
| Std error      | $5.5 \times 10^3$  | Std error   | $1.2 \times 10^{-2}$ |
| R <sup>2</sup> | 0.84               | F statistic | $1.4 \times 10^2$    |
| DoF            | 26                 |             |                      |

**Htelo**

|                |                     |             |                       |
|----------------|---------------------|-------------|-----------------------|
| Slope (Ka)     | $2.443 \times 10^5$ | Intercept   | $-6.5 \times 10^{-2}$ |
| Std error      | $7.6 \times 10^3$   | Std error   | $1.7 \times 10^{-2}$  |
| R <sup>2</sup> | 0.98                | F statistic | $1.0 \times 10^3$     |
| DoF            | 26                  |             |                       |



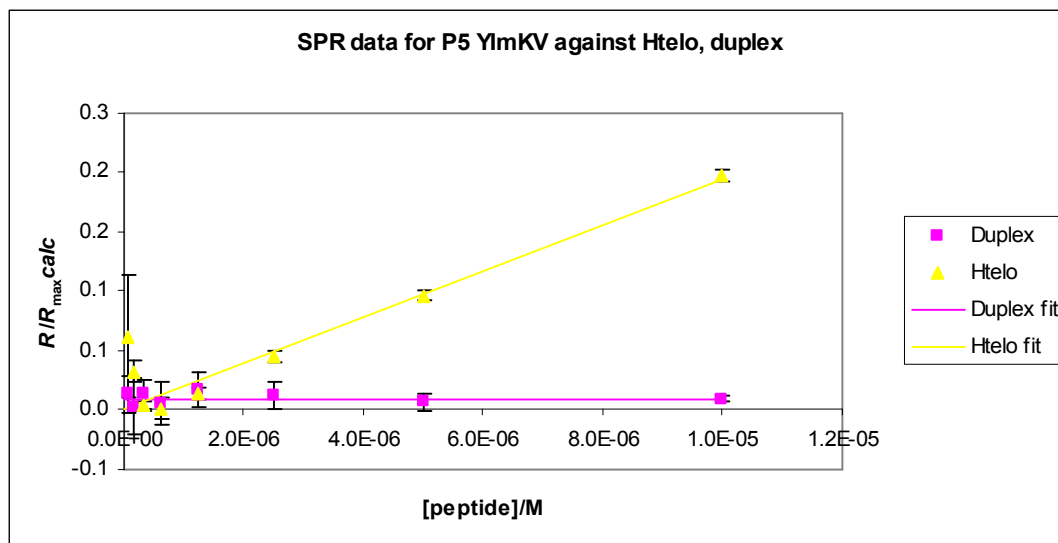

### Duplex

|                |                      |             |                      |
|----------------|----------------------|-------------|----------------------|
| Slope (Ka)     | $-3 \times 10^1$     | Intercept   | $9.6 \times 10^{-3}$ |
| Std error      | $1.5 \times 10^3$    | Std error   | $6.6 \times 10^{-3}$ |
| R <sup>2</sup> | $1.6 \times 10^{-5}$ | F statistic | $4.3 \times 10^{-4}$ |
| DoF            | 26                   |             |                      |

### Htelo

|                |                     |             |                      |
|----------------|---------------------|-------------|----------------------|
| Slope (Ka)     | $1.927 \times 10^4$ | Intercept   | $1.1 \times 10^{-3}$ |
| Std error      | $9.7 \times 10^2$   | Std error   | $4.2 \times 10^{-3}$ |
| R <sup>2</sup> | 0.94                | F statistic | $3.92 \times 10^2$   |
| DoF            | 26                  |             |                      |

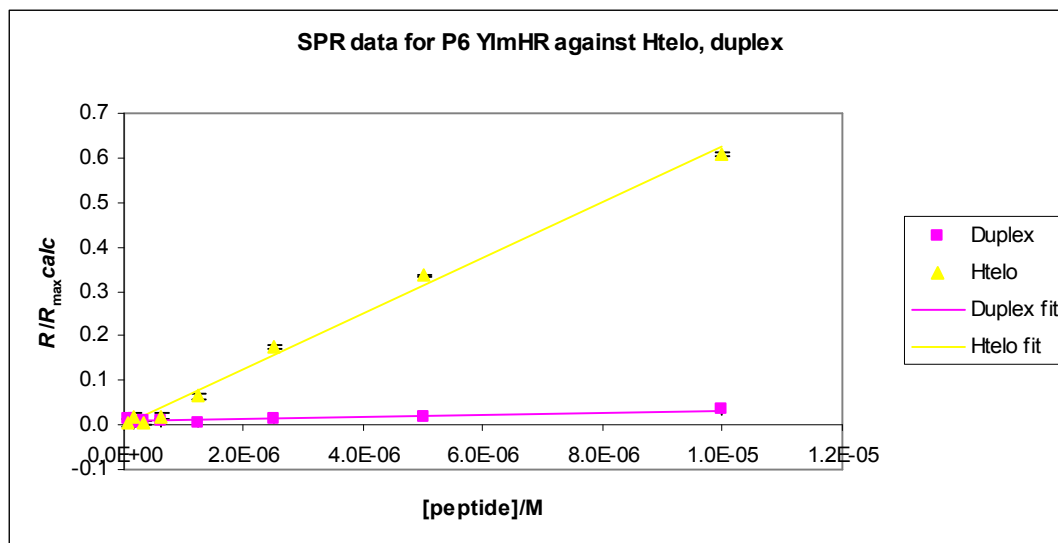

### Duplex

|                |                   |             |                      |
|----------------|-------------------|-------------|----------------------|
| Slope (Ka)     | $2.5 \times 10^3$ | Intercept   | $7.3 \times 10^{-3}$ |
| Std error      | $1.1 \times 10^3$ | Std error   | $4.5 \times 10^{-3}$ |
| R <sup>2</sup> | 0.15              | F statistic | 5.3                  |
| DoF            | 30                |             |                      |

### Htelo

|                |                    |             |                       |
|----------------|--------------------|-------------|-----------------------|
| Slope (Ka)     | $6.25 \times 10^4$ | Intercept   | $-1.3 \times 10^{-3}$ |
| Std error      | $1.1 \times 10^3$  | Std error   | $4.3 \times 10^{-3}$  |
| R <sup>2</sup> | 0.99               | F statistic | $3.4 \times 10^3$     |
| DoF            | 30                 |             |                       |

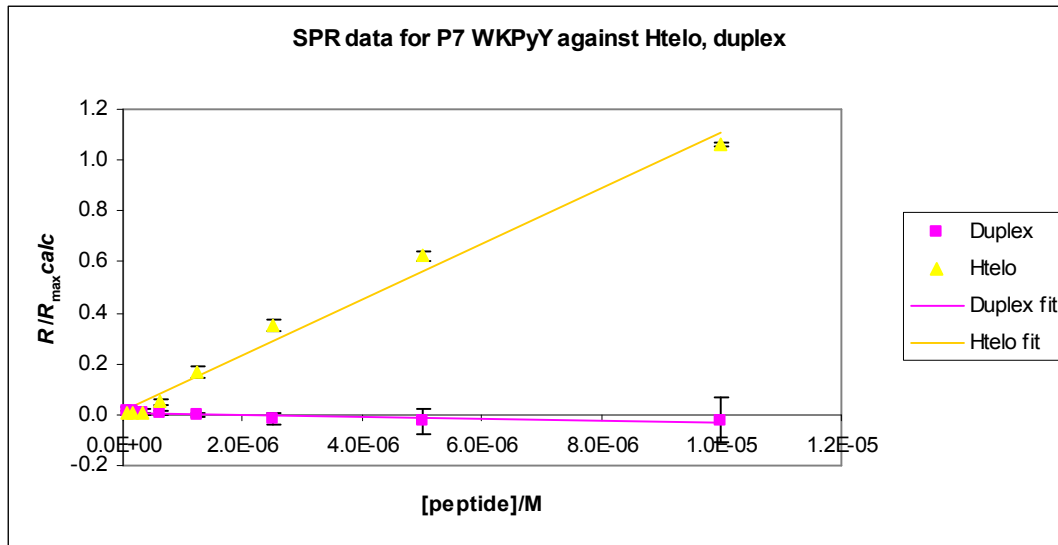

**Duplex**

|                |                      |             |                      |
|----------------|----------------------|-------------|----------------------|
| Slope (Ka)     | $-3.7 \times 10^3$   | Intercept   | $6 \times 10^{-3}$   |
| Std error      | $3.7 \times 10^3$    | Std error   | $1.5 \times 10^{-2}$ |
| R <sup>2</sup> | $3.2 \times 10^{-2}$ | F statistic | $9.8 \times 10^{-1}$ |
| DoF            | 30                   |             |                      |

**Htelo**

|                |                     |             |                      |
|----------------|---------------------|-------------|----------------------|
| Slope (Ka)     | $1.098 \times 10^5$ | Intercept   | $1.1 \times 10^{-2}$ |
| Std error      | $2.8 \times 10^3$   | Std error   | $1.1 \times 10^{-2}$ |
| R <sup>2</sup> | 0.98                | F statistic | $1.6 \times 10^3$    |
| DoF            | 30                  |             |                      |

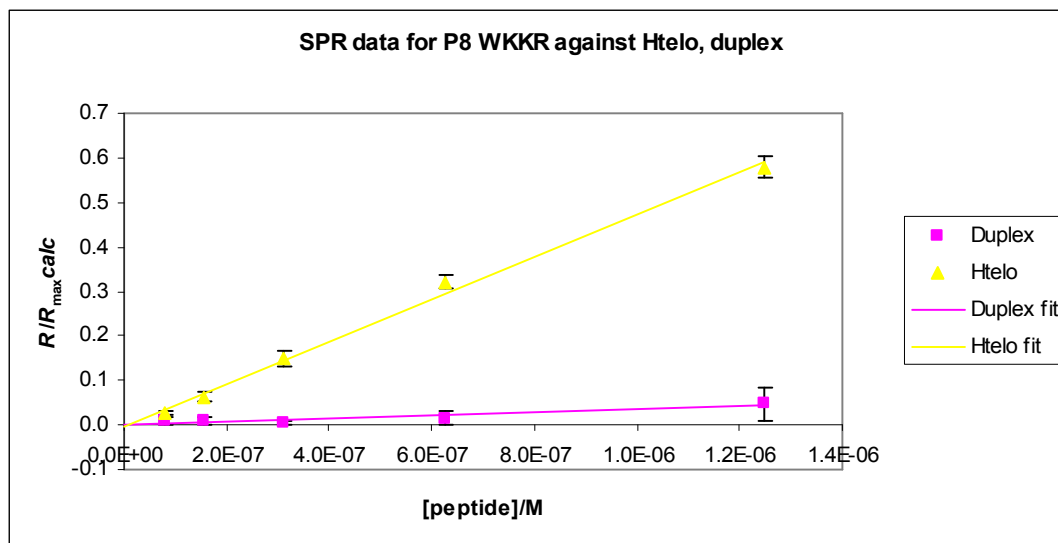

**Duplex**

|                |                   |             |                      |
|----------------|-------------------|-------------|----------------------|
| Slope (Ka)     | $3.5 \times 10^4$ | Intercept   | $-7 \times 10^{-4}$  |
| Std error      | $1.8 \times 10^4$ | Std error   | $1.2 \times 10^{-2}$ |
| R <sup>2</sup> | 0.17              | F statistic | 3.7                  |
| DoF            | 18                |             |                      |

**Htelo**

|                |                    |             |                      |
|----------------|--------------------|-------------|----------------------|
| Slope (Ka)     | $4.74 \times 10^5$ | Intercept   | $2 \times 10^{-3}$   |
| Std error      | $1.7 \times 10^4$  | Std error   | $1.1 \times 10^{-2}$ |
| R <sup>2</sup> | 0.98               | F statistic | $7.6 \times 10^2$    |
| DoF            | 18                 |             |                      |

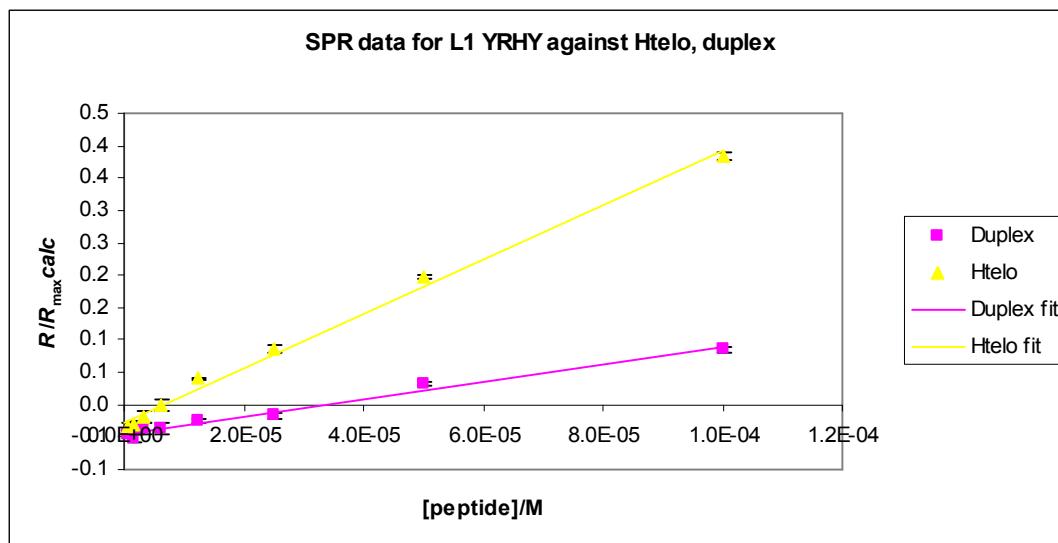

**Duplex**

|                |                     |             |                        |
|----------------|---------------------|-------------|------------------------|
| Slope (Ka)     | $1.346 \times 10^3$ | Intercept   | $-4.56 \times 10^{-2}$ |
| Std error      | $6.6 \times 10^1$   | Std error   | $2.7 \times 10^{-3}$   |
| R <sup>2</sup> | 0.97                | F statistic | $4.2 \times 10^2$      |
| DoF            | 14                  |             |                        |

**Htelo**

|                |                     |             |                        |
|----------------|---------------------|-------------|------------------------|
| Slope (Ka)     | $4.215 \times 10^3$ | Intercept   | $-2.71 \times 10^{-2}$ |
| Std error      | $8.7 \times 10^1$   | Std error   | $3.6 \times 10^{-3}$   |
| R <sup>2</sup> | 0.99                | F statistic | $2.3 \times 10^3$      |
| DoF            | 14                  |             |                        |

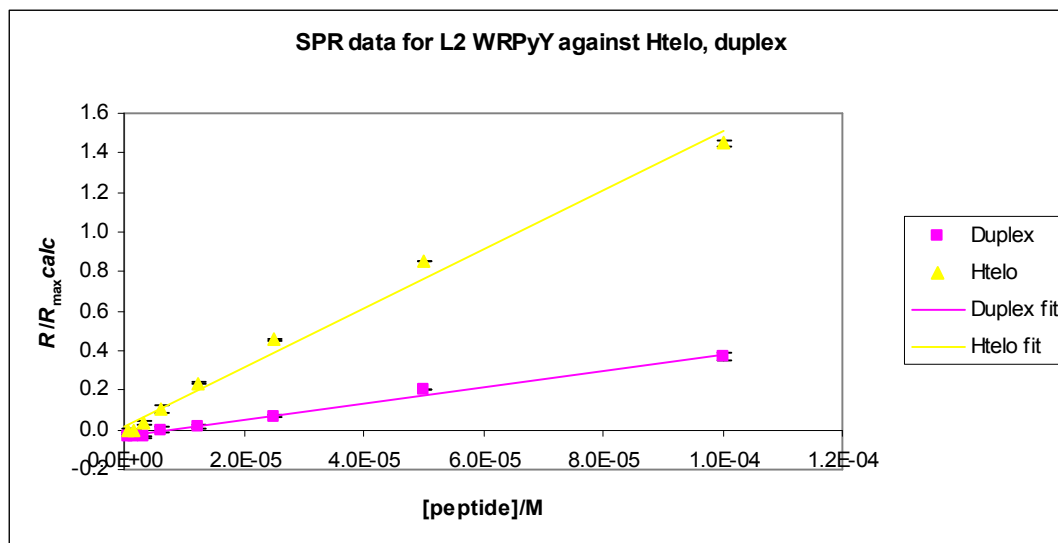

### Duplex

|            |                    |             |                        |
|------------|--------------------|-------------|------------------------|
| Slope (Ka) | $4.16 \times 10^3$ | Intercept   | $-3.36 \times 10^{-2}$ |
| Std error  | $1.3 \times 10^2$  | Std error   | $5.3 \times 10^{-3}$   |
| $R^2$      | 0.99               | F statistic | $1.0 \times 10^3$      |
| DoF        | 14                 |             |                        |

### Htelo

|            |                     |             |                      |
|------------|---------------------|-------------|----------------------|
| Slope (Ka) | $1.489 \times 10^4$ | Intercept   | $2.0 \times 10^{-2}$ |
| Std error  | $4.2 \times 10^2$   | Std error   | $1.7 \times 10^{-2}$ |
| $R^2$      | 0.99                | F statistic | $1.2 \times 10^3$    |
| DoF        | 14                  |             |                      |

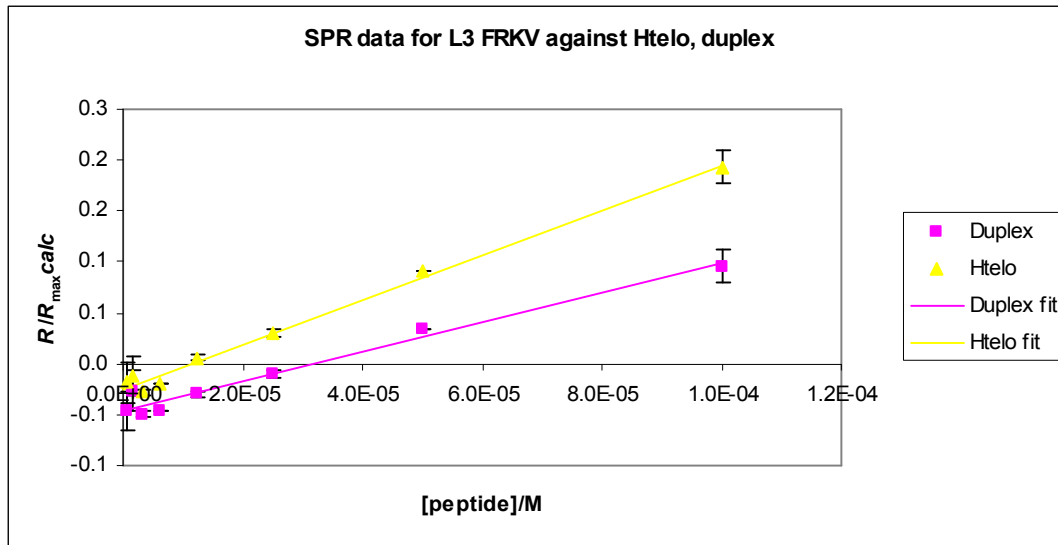

**Duplex**

|                |                    |             |                        |
|----------------|--------------------|-------------|------------------------|
| Slope (Ka)     | $1.44 \times 10^3$ | Intercept   | $-4.57 \times 10^{-2}$ |
| Std error      | $1.2 \times 10^2$  | Std error   | $4.8 \times 10^{-3}$   |
| R <sup>2</sup> | 0.92               | F statistic | $1.5 \times 10^2$      |
| DoF            | 14                 |             |                        |

**Htelo**

|                |                    |             |                        |
|----------------|--------------------|-------------|------------------------|
| Slope (Ka)     | $2.20 \times 10^3$ | Intercept   | $-2.46 \times 10^{-2}$ |
| Std error      | $7.0 \times 10^1$  | Std error   | $2.8 \times 10^{-3}$   |
| R <sup>2</sup> | 0.99               | F statistic | $1.0 \times 10^3$      |
| DoF            | 14                 |             |                        |

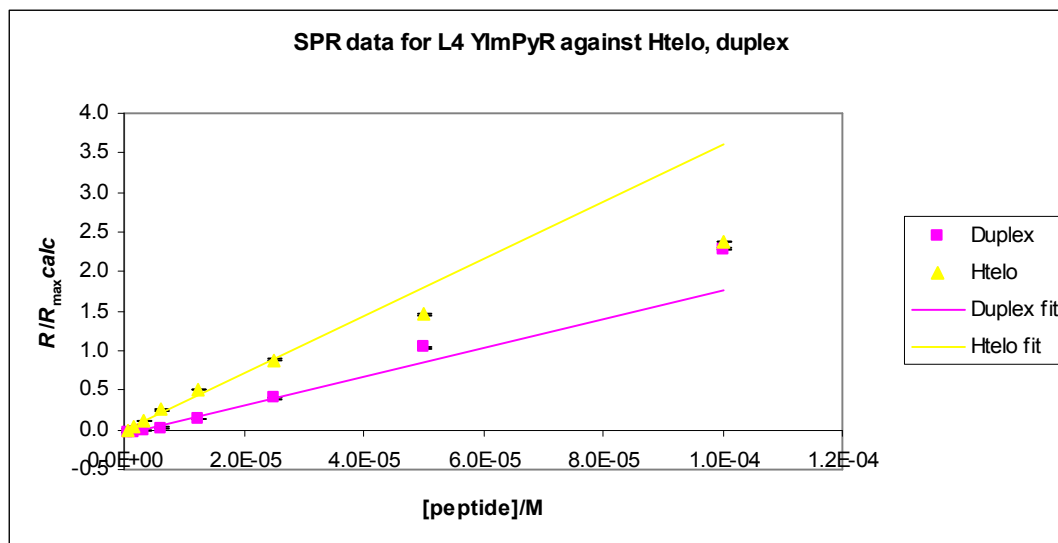

**Duplex**

|                |                     |             |                        |
|----------------|---------------------|-------------|------------------------|
| Slope (Ka)     | $1.823 \times 10^4$ | Intercept   | $-6.73 \times 10^{-2}$ |
| Std error      | $6.6 \times 10^2$   | Std error   | $7.8 \times 10^{-3}$   |
| R <sup>2</sup> | 0.99                | F statistic | $7.7 \times 10^2$      |
| DoF            | 10                  |             |                        |

**Htelo**

|                |                    |             |                      |
|----------------|--------------------|-------------|----------------------|
| Slope (Ka)     | $3.61 \times 10^4$ | Intercept   | $4 \times 10^{-3}$   |
| Std error      | $1.0 \times 10^3$  | Std error   | $1.2 \times 10^{-2}$ |
| R <sup>2</sup> | 0.99               | F statistic | $1.3 \times 10^3$    |
| DoF            | 10                 |             |                      |



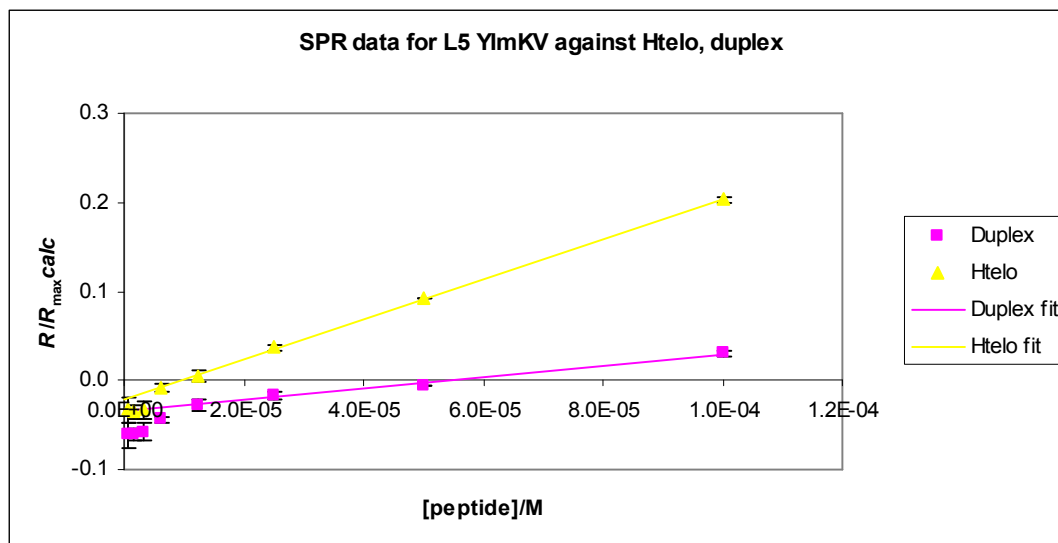

### Duplex

|                |                    |             |                        |
|----------------|--------------------|-------------|------------------------|
| Slope (Ka)     | $6.49 \times 10^2$ | Intercept   | $-3.55 \times 10^{-2}$ |
| Std error      | $5.8 \times 10^1$  | Std error   | $3.3 \times 10^{-3}$   |
| R <sup>2</sup> | 0.95               | F statistic | $1.3 \times 10^2$      |
| DoF            | 6                  |             |                        |

### Htelo

|                |                     |             |                        |
|----------------|---------------------|-------------|------------------------|
| Slope (Ka)     | $2.256 \times 10^3$ | Intercept   | $-2.17 \times 10^{-2}$ |
| Std error      | $4.9 \times 10^1$   | Std error   | $2.8 \times 10^{-3}$   |
| R <sup>2</sup> | 0.997               | F statistic | $2.1 \times 10^3$      |
| DoF            | 6                   |             |                        |

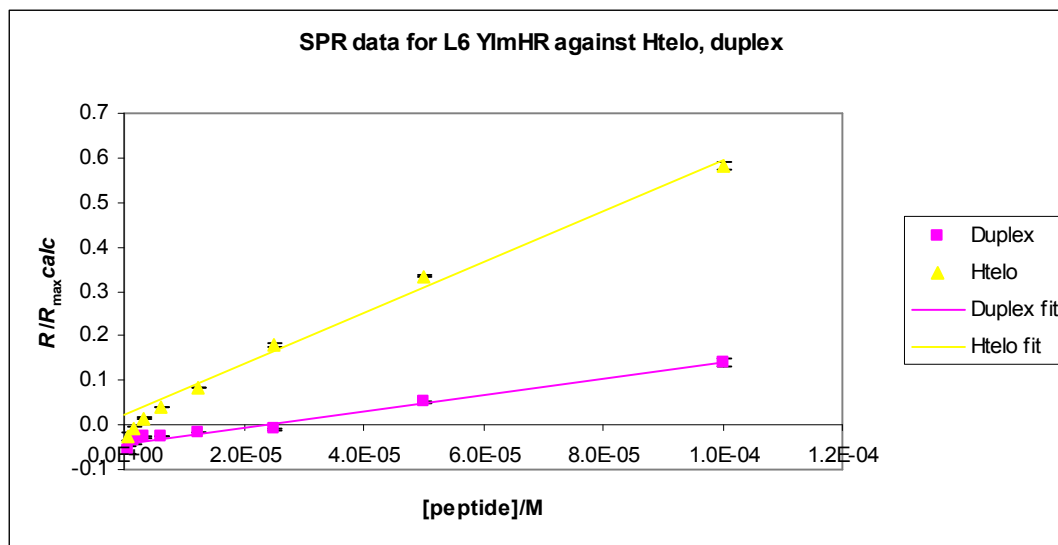

**Duplex**

|            |                     |             |                        |
|------------|---------------------|-------------|------------------------|
| Slope (Ka) | $1.838 \times 10^3$ | Intercept   | $-4.28 \times 10^{-2}$ |
| Std error  | $8.2 \times 10^1$   | Std error   | $4.2 \times 10^{-3}$   |
| R2         | 0.98                | F statistic | $5.1 \times 10^2$      |
| DoF        | 8                   |             |                        |

**Htelo**

|            |                    |             |                       |
|------------|--------------------|-------------|-----------------------|
| Slope (Ka) | $5.74 \times 10^3$ | Intercept   | $2.16 \times 10^{-2}$ |
| Std error  | $1.8 \times 10^2$  | Std error   | $9.2 \times 10^{-3}$  |
| R2         | 0.99               | F statistic | $1.0 \times 10^3$     |
| DoF        | 8                  |             |                       |

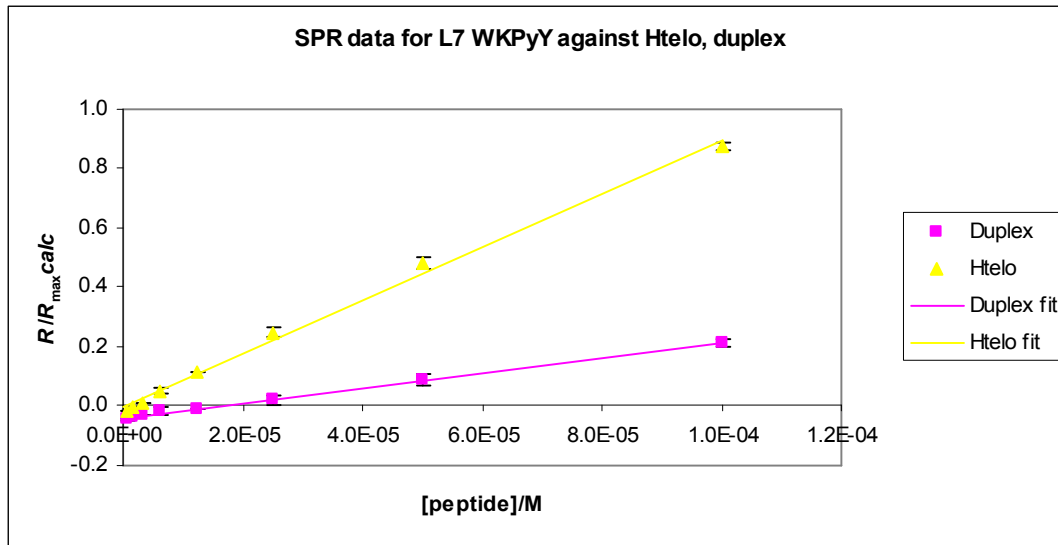

**Duplex**

|                |                     |             |                        |
|----------------|---------------------|-------------|------------------------|
| Slope (Ka)     | $2.538 \times 10^3$ | Intercept   | $-4.02 \times 10^{-2}$ |
| Std error      | $9.2 \times 10^1$   | Std error   | $3.8 \times 10^{-3}$   |
| R <sup>2</sup> | 0.98                | F statistic | $7.6 \times 10^2$      |
| DoF            | 14                  |             |                        |

**Htelo**

|                |                    |             |                       |
|----------------|--------------------|-------------|-----------------------|
| Slope (Ka)     | $9.02 \times 10^3$ | Intercept   | $-4.0 \times 10^{-3}$ |
| Std error      | $1.7 \times 10^2$  | Std error   | $7.0 \times 10^{-3}$  |
| R <sup>2</sup> | 0.99               | F statistic | $2.7 \times 10^3$     |
| DoF            | 14                 |             |                       |

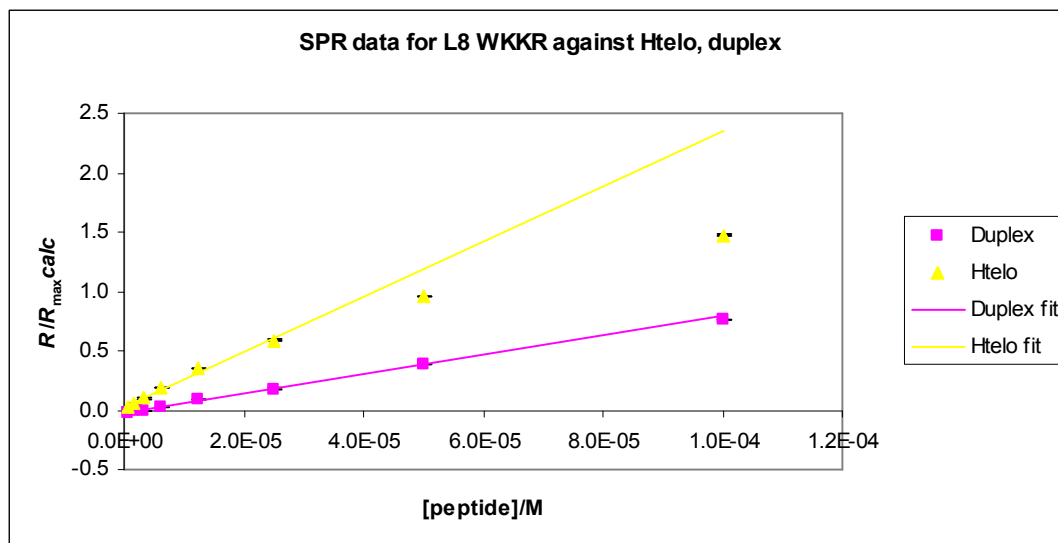

**Duplex**

|                |                    |             |                        |
|----------------|--------------------|-------------|------------------------|
| Slope (Ka)     | $8.23 \times 10^3$ | Intercept   | $-2.30 \times 10^{-2}$ |
| Std error      | $2.37 \times 10^2$ | Std error   | $2.8 \times 10^{-3}$   |
| R <sup>2</sup> | 0.99               | F statistic | $1.2 \times 10^3$      |
| DoF            | 10                 |             |                        |

**Htelo**

|                |                     |             |                       |
|----------------|---------------------|-------------|-----------------------|
| Slope (Ka)     | $2.334 \times 10^4$ | Intercept   | $2.60 \times 10^{-2}$ |
| Std error      | $8.2 \times 10^2$   | Std error   | $9.7 \times 10^{-3}$  |
| R <sup>2</sup> | 0.99                | F statistic | $8.1 \times 10^2$     |
| DoF            | 10                  |             |                       |

**Summary of apparent association constants of linear peptides for quadruplex, and duplex DNA.**

| Sequence  |           | SPR $\log(K_a)$ L series |     |
|-----------|-----------|--------------------------|-----|
|           |           | Htelo                    | Dup |
| <b>L1</b> | YRHY      | 3.6                      | 3.1 |
| <b>L2</b> | WR-Py-Y   | 4.2                      | 3.6 |
| <b>L3</b> | FRKV      | 3.3                      | 3.2 |
| <b>L4</b> | Y-Im-Py-R | 4.6                      | 4.3 |
| <b>L5</b> | Y-Im-KV   | 3.4                      | 2.8 |
| <b>L6</b> | Y-Im-HR   | 3.8                      | 3.3 |
| <b>L7</b> | WK-Py-Y   | 4.0                      | 3.4 |
| <b>L8</b> | WKKR      | 4.4                      | 3.9 |

**Apparent association constants, with standard errors, for branched polyamides determined by ELISA.**

| Sequence  |           | ELISA <b>B</b> series<br>$\log(K_a) \pm \text{std. error}$ |
|-----------|-----------|------------------------------------------------------------|
| <b>B1</b> | YRHY      | $5.7 \pm 0.1$                                              |
| <b>B2</b> | WR-Py-Y   | $6.3 \pm 0.1$                                              |
| <b>B3</b> | FRKV      | $6.8 \pm 0.1$                                              |
| <b>B4</b> | Y-Im-Py-R | $6.6 \pm 0.1$                                              |
| <b>B5</b> | Y-Im-KV   | $5.2 \pm 0.3$                                              |
| <b>B6</b> | Y-Im-HR   | $6.3 \pm 0.1$                                              |
| <b>B7</b> | WK-Py-Y   | $6.4 \pm 0.1$                                              |
| <b>B8</b> | WKKR      | $7.4 \pm 0.3$                                              |

**Scatterplot of single point ELISA screen responses for crude peptides against Htelo versus  $\log(K_a)$  determined by ELISA titration using purified compounds B1 - B8.**

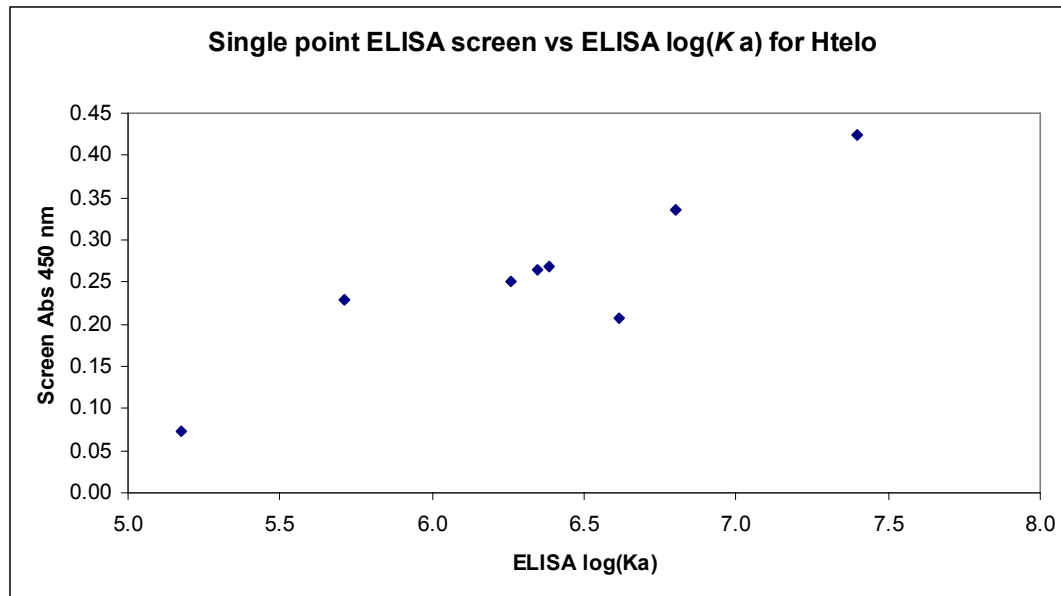

Kendall  $\tau$  0.71

Two sided significance 0.013

**Scatterplot of ELISA  $\log(K_a)$  and SPR  $\log(K_a)$  for ligand binding to Htelo quadruplex**

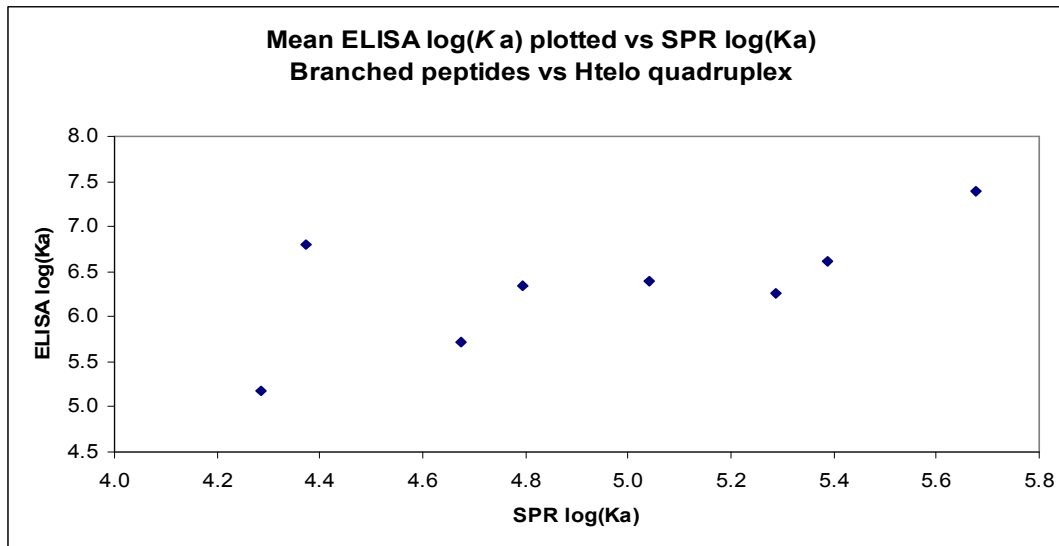

ELISA determinations are for biotinylated compounds (**B** series), whereas SPR relates to the corresponding unbiotinylated compound (**P** series). Regression statistics are given below.

|                |      |                         |      |
|----------------|------|-------------------------|------|
| Slope          | 1.05 | Standard Error          | 0.48 |
| Intercept      | 1.1  | Standard Error          | 2.4  |
| R <sup>2</sup> | 0.44 | Pearson R               | 0.66 |
| F              | 4.7  | Degrees of Freedom      | 6    |
| t              | 2.2  | Significance (2 tailed) | 0.07 |



**Scatterplot of SPR Htelo  $\log(K_a)$  for linear peptides (L1 – L8) against branched peptides (P1 – P8)**

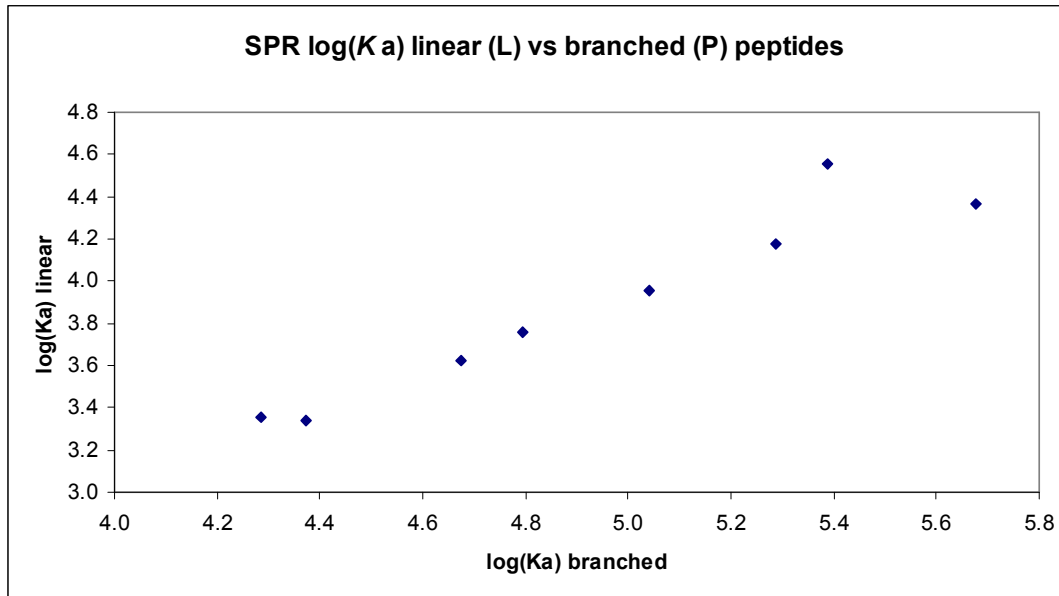

|           |       |                         |         |
|-----------|-------|-------------------------|---------|
| Slope     | 0.88  | Standard Error          | 0.10    |
| Intercept | -0.45 | Standard Error          | 0.51    |
| R2        | 0.92  | Pearson R               | 0.96    |
| F         | 73    | Degrees of Freedom      | 6       |
| t         | 8.5   | Significance (2 tailed) | 0.00014 |

### Melting temperature of F21T quadruplex on ligand addition

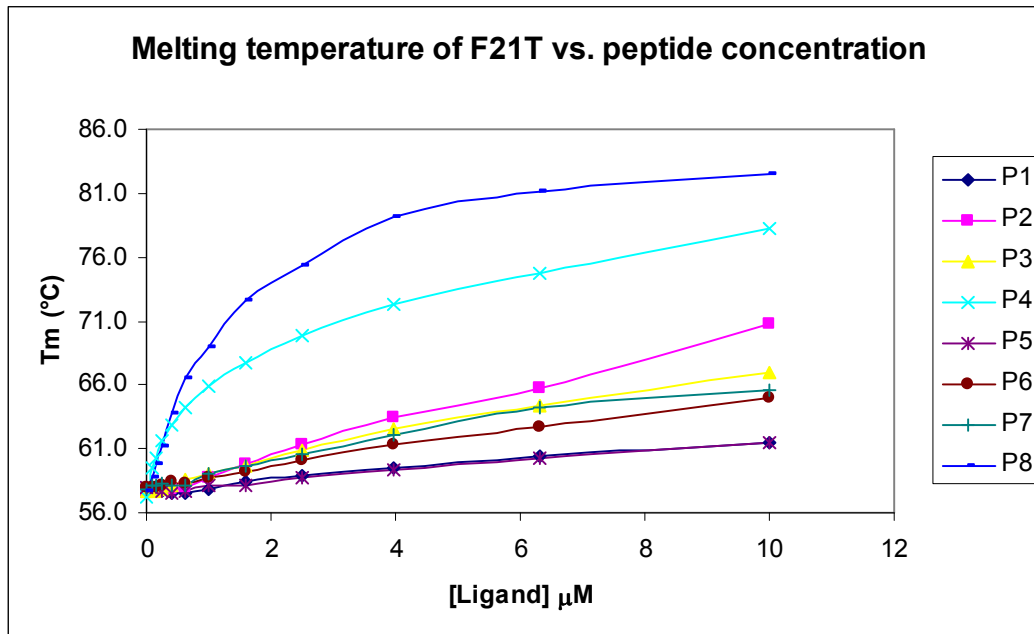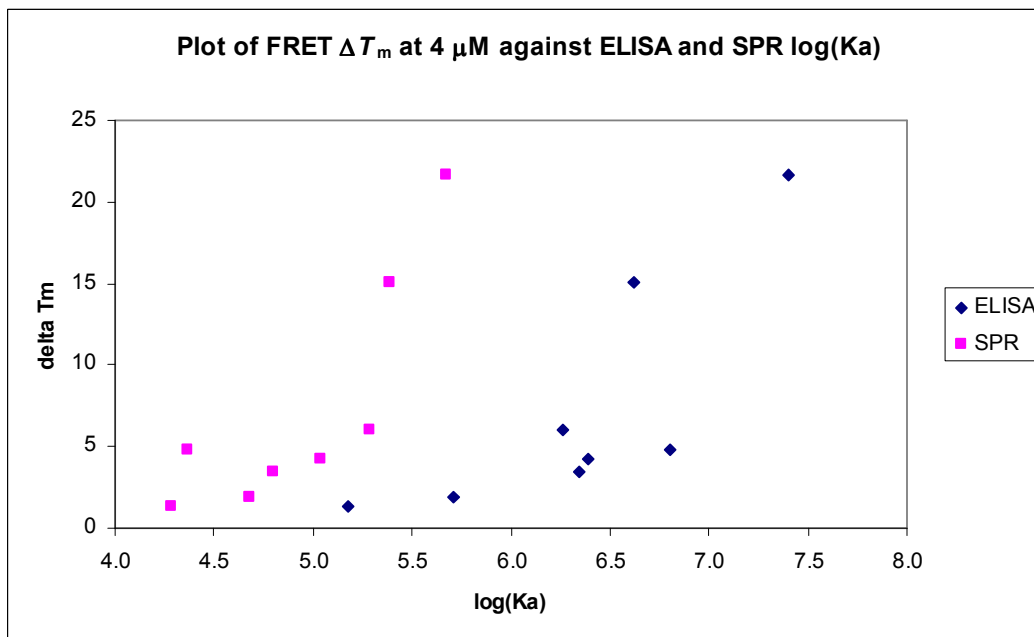

$\Delta T_m$  at 4  $\mu\text{M}$  vs. ELISA  $\log(K_a)$

Kendall  $\tau$  0.71                      Two sided significance 0.013

$\Delta T_m$  at 4  $\mu\text{M}$  vs. SPR  $\log(K_a)$

Kendall  $\tau$  0.79                      Two sided significance 0.0065
